# Supplementary material for: Dickkopf1 - A New Player in Modelling the Wnt Pathway
Source: PLOS journal article supplement (doi:10.1371/journal.pone.0025550), 2011-10-12
Supplement: S3 (10.1371/journal.pone.0025550.s003) [file journal.pone.0025550.s003]

**Figure S3 - Desynchronization of neighboring cells**

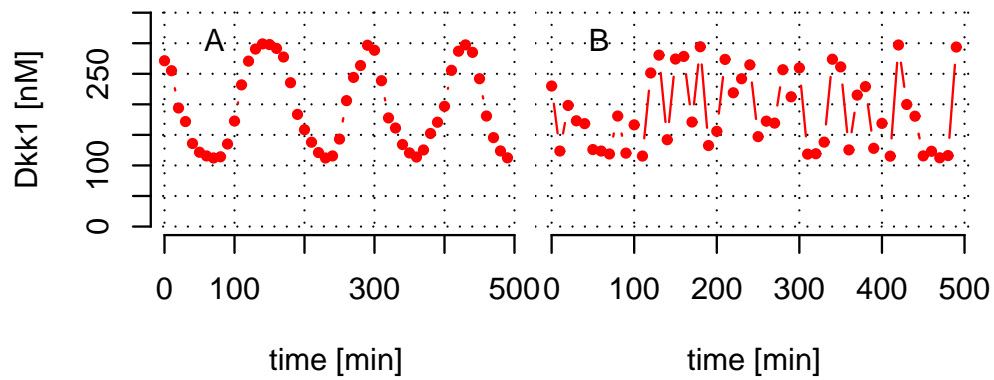

If the desynchronization between neighboring cells is small (**A**) then the oscillations of the Dkk1 level at the determination front is almost unaltered. However, if the desynchronization is strong then these oscillations are not appearing.
